# Supplementary material for: Brain Atrophy Mediates the Relationship between Misfolded Proteins Deposition and Cognitive Impairment in Parkinson’s Disease
Source: J Pers Med. 2021 Jul 23;11(8):702. doi: 10.3390/jpm11080702 (PMC8401428; doi:10.3390/jpm11080702)
Supplement: Supplementary file 1 [file jpm-11-00702-s001.zip › jpm-1275258-SI.pdf]

**Figure S1.** ROC curve analysis of plasma misfolded proteins. Discrimination of PD and normal groups by p-Tau (pg/ml), A $\beta$ 42 (pg/ml),  $\alpha$ Syn (fg/ml) and NfL (pg/ml).

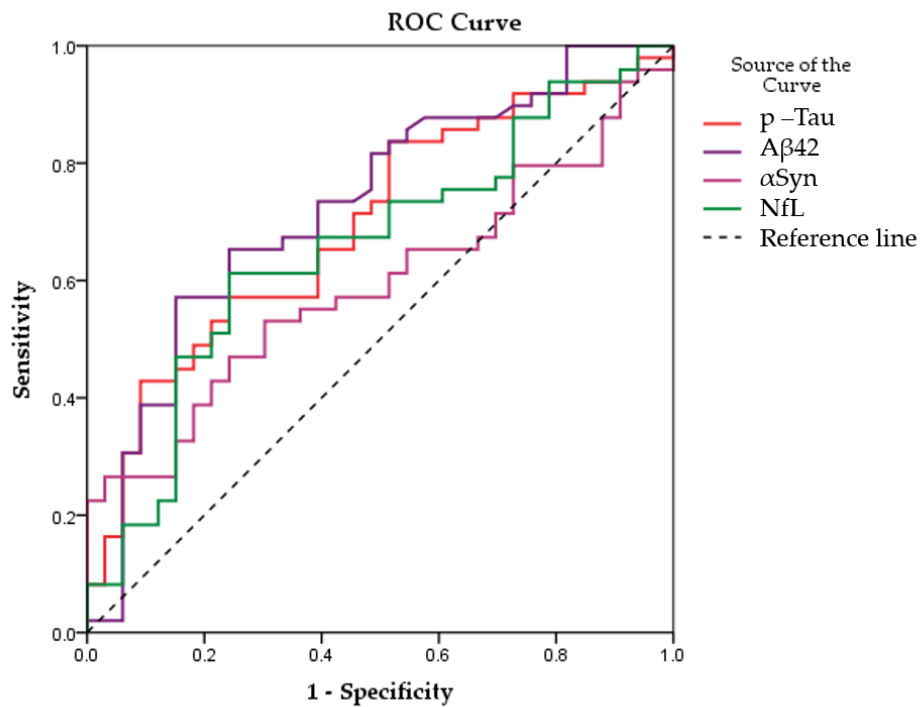

|              | p-Tau   | A $\beta$ 42 | $\alpha$ Syn | NfL    |
|--------------|---------|--------------|--------------|--------|
| Cutoff-value | 23.795  | 16.860       | 137.340      | 10.555 |
| Sensitivity  | 0.429   | 0.571        | 0.265        | 0.612  |
| Specificity  | 0.909   | 0.848        | 0.970        | 0.758  |
| AUC          | 0.724   | 0.764        | 0.618        | 0.657  |
| p            | <0.001* | <0.001*      | 0.058        | 0.017* |

**Abbreviations:** ROC curve (Receiver operating characteristic curve), p-Tau (phosphorylated-Tau), A $\beta$ 42 (amyloid $\beta$ -42),  $\alpha$ Syn ( $\alpha$ -synuclein), NfL (neurofilament light chain)

\* Indicates  $p < 0.05$

We performed ROC curve analysis to evaluate plasma levels of p-Tau, A $\beta$ 42,  $\alpha$ Syn and NfL in PD and normal groups. The cut-off value was chosen according to the maximum Youden's index (sensitivity + specificity-1). Statistical analysis was performed using SPSS version 20. The cut-off value for p-Tau is 23.795 pg/ml (sensitivity=42.9%, specificity= 90.9%, AUC= 0.724,  $p < 0.001$ ), 16.860 pg/ml for A $\beta$ 42 (sensitivity=57.1%, specificity= 84.8%, AUC= 0.764,  $p < 0.001$ ), 137.340 fg/ml for  $\alpha$ Syn (sensitivity=26.5%, specificity= 97%, AUC= 0.618,  $p = 0.058$ ), and 10.555 pg/ml for NfL (sensitivity=61.2%, specificity= 75.8%, AUC= 0.657,  $p = 0.017$ ).
